**S3 Table. AOM recurrence outcome definitions and timeframes for included studies**

| <b>Study</b>             | <b>Recurrence Definition</b>                                                                                                                             | <b>Recurrence Timeframe</b>   |
|--------------------------|----------------------------------------------------------------------------------------------------------------------------------------------------------|-------------------------------|
| <b>Bezakova 2009</b>     | Parent-reported AOM recurrence recorded in questionnaire                                                                                                 | 6 months to 3.5 years         |
| <b>Hoberman 2011</b>     | The reappearance of acute otitis media in a patient previous classified as clinical success (days 10-12) at visit on days 21-25                          | 21-25 days                    |
| <b>Kaleida 1991</b>      | Development of AOM 15 or more days after initiation of treatment for a preceding episode                                                                 | 2-6 weeks                     |
| <b>Laxdal 1970</b>       | No definition provided, termed "relapses"                                                                                                                | 1-33 months (mean: 16 months) |
| <b>Le Saux 2005</b>      | No definition provided, termed "recurrence"                                                                                                              | 1 or 3 months                 |
| <b>McCormick 2005</b>    | Returning to office with acute symptoms on days 13-30 with acute ear symptoms, abnormal tympanic membrane, and an AOM-Si score higher than at enrollment | 30 days                       |
| <b>Molder 2016</b>       | New episode defined as 28 days since prior AOM-related consultation                                                                                      | 4 years                       |
| <b>Mygind 1981</b>       | Not provided                                                                                                                                             | 3 months                      |
| <b>Ruohola 2018</b>      | Recurrence assessed during scheduled visits                                                                                                              | 90 days +/- 10 days           |
| <b>Shahbaznejad 2021</b> | Patient reported AOM symptoms recurrence                                                                                                                 | 3 months                      |
| <b>Thalin 1985</b>       | Recurrence of AOM after the end of medical treatment and before day 30                                                                                   | 30 days                       |
