**S4 Table. Risk ratios for primary and sensitivity analyses**

| Outcome                          | Primary Analysis<br>RR (95% CI) | Sensitivity Analysis<br>with poor-quality<br>studies removed<br>RR (95% CI) | Sensitivity Analysis<br>with studies published<br>prior to 2000 removed<br>RR (95% CI) |
|----------------------------------|---------------------------------|-----------------------------------------------------------------------------|----------------------------------------------------------------------------------------|
| Any antibiotic<br>adverse effect | 1.49 (1.27-1.73)                | 1.50 (1.32-1.70)                                                            | 1.50 (1.31-1.71)                                                                       |
| Contralateral otitis<br>media    | 0.37 (0.23-0.62)                | 0.43 (0.24-0.76)                                                            | 0.44 (0.24-0.81)                                                                       |
| Recurrence                       | 1.03 (0.87-1.22)                | 0.94 (0.87-1.02)                                                            | 0.90 (0.78-1.03)                                                                       |
| Short term<br>recurrence         | 0.91 (.80-1.04)                 | 0.90 (0.79-1.03)                                                            | 0.84 (0.67-1.05)                                                                       |
| Long-term recurrence             | 1.45 (0.92-2.30)                | 0.97(0.87-1.07)                                                             | 0.97 (0.87-1.07)                                                                       |
| Diarrhea                         | 1.73 (1.46-2.05)                | 1.71 (1.43-2.04)                                                            | 1.72 (1.38-2.14)                                                                       |
| Mastoiditis                      | 0.48 (0.40-0.59)                | No studies excluded                                                         | No studies excluded                                                                    |
| Rash                             | 1.34 (0.99-1.83)                | 1.33 (.93-1.89)                                                             | 1.25 (0.79-1.97)                                                                       |
| Tympanic membrane<br>perforation | 0.31 (0.15-0.67)                | 0.45 (0.19-1.09)                                                            | 0.36 (0.07-1.83)                                                                       |
| Vomiting                         | 1.06 (0.78-1.44)                | No studies excluded                                                         | 0.97 (0.69-1.35)                                                                       |
